# Supplementary material for: Metal-phenolic networks as tuneable spore coat mimetics
Source: Royal Society of Chemistry journal article supplement (doi:10.1039/d2tb00717g), 2022-01-01
Supplement: d2tb00717g1.pdf [file d2tb00717g1.pdf]

## Supplementary Material

### Metal-phenolic networks as tunable spore coat mimetics

Pris Wasuwanich,<sup>1†</sup> Gang Fan,<sup>1†</sup> Benjamin Burke<sup>1</sup>, and Ariel L. Furst<sup>1,2,\*</sup>

<sup>1</sup>Department of Chemical Engineering, Massachusetts Institute of Technology, Cambridge, MA, USA

<sup>2</sup>Center for Environmental Health Sciences, Massachusetts Institute of Technology, Cambridge, MA, USA

<sup>†</sup>These authors contributed equally

\*Correspondence: afurst@mit.edu

## Table of Contents

|                                             |           |
|---------------------------------------------|-----------|
| <b>1. Experimental Section.....</b>         | <b>2</b>  |
| 1.1 Chemicals and Reagents                  |           |
| 1.2 Analysis and Measurement                |           |
| 1.3 Bacterial Strain and Culture            |           |
| 1.4 MPN Encapsulation                       |           |
| 1.5 Preparation of Lyophilized Cells        |           |
| 1.6 Bacterial Growth/Viability Measurements |           |
| <b>2. Supplemental Figures.....</b>         | <b>3</b>  |
| <b>3. Supplemental References.....</b>      | <b>10</b> |

## 1. Experimental section:

**1.1 Chemicals and Reagents.** All chemicals were reagent grade and used without further purification unless otherwise stated. Tannic acid (99%), gallic acid monohydrate (98%), L-ascorbic acid (99%), iron (III) chloride ( $\text{FeCl}_3$ , 97%), aluminum chloride (99.9%), zinc sulfate heptahydrate (99%), manganese sulfate monohydrate (99%), 3-(N-morpholino) propanesulfonic acid (MOPS, 99.5%), sodium hydroxide (98%), hydrochloric acid (37%), acetone (99.5%), D-(+)-trehalose dihydrate (99%), sodium phosphate dibasic (99%), sodium phosphate monobasic (99%), and citric acid (99.5%) were purchased from Sigma-Aldrich. Absolute ethanol (molecular biology grade), sodium chloride, and agar (granulated) were purchased from Fisher BioReagents. Nutrient broth (microbiologically tested) powder was purchased from Fluka. Green tea extract (50% EGCG) was purchased from Bulk Supplements. Ultrapure water was generated from an ELGA PURELAB Quest UV (Model number: PQDIUVM1NSP). LIVE/DEAD™ BacLight™ Bacterial Viability Kit was purchased from ThermoFisher. Nutrient broth liquid media were prepared with 8 g of nutrient broth powder in 1L of nanopure water (adjust pH to 7.0 with sodium hydroxide) and used after autoclaving (20 min, 121° C). Nutrient agar plates were prepared on Petri dishes with 20 mL of nutrient agar solution (8 g of nutrient broth powder, and 15 g of agar in 1L of nanopure water, Adjusting pH to 7.0).

**1.2 Analysis and Measurement.** Optical density or absorbance was measured with a NanoDrop™ One Microvolume UV-Vis Spectrophotometer (Thermo Scientific, USA) or a Biotek synergy mx microplate reader (BioTek Instruments, USA). The cells were observed with a Revolve Fluorescence Microscope (Echo, USA).

**1.3 Bacterial Strains and Culture.** Strain (*Bacillus subtilis* (Ehrenberg) Cohn (ATCC 6051 LOT: 70044049) was used in this study. Cells were prepared for MPN coating as follows: *B. subtilis* strains (20% glycerol) stored at -80 °C were streaked onto nutrient agar plates and aerobically kept for ~18h at 30 °C. Single colonies were to inoculate nutrient broth. The cultures were kept for ~18 h at 30 °C and washed with nanopure water followed by centrifugation (6000 x g for 20 min, three times). After the final wash, cells were concentrated to a suspension ( $\text{OD}_{600}$  of 4.0, 4x stock) and were used immediately.

**1.4 MPN Encapsulation.** MPNs were coated on the surface of *B. subtilis* as previously published.<sup>1</sup> For different MPNs, equivalent amounts of tannic acid (1.6 mg mL<sup>-1</sup>), gallic acid (1.5 mg mL<sup>-1</sup>) or epigallocatechin gallate (2.7 mg mL<sup>-1</sup>, 50% from tea extract) and an equal volume freshly-made aqueous solution of iron chloride (0.24 mg mL<sup>-1</sup>), zinc sulfate heptahydrate (0.42 mg mL<sup>-1</sup>), aluminum chloride (0.19 mg mL<sup>-1</sup>), or manganese sulfate monohydrate (0.72 mg mL<sup>-1</sup>) were applied for encapsulation.

**1.5 Preparation of Lyophilized Cells.** The lyophilization of uncoated and MPN-coated *B. subtilis* were prepared according to previous protocol.<sup>1</sup> Before use, the lyophilized cells were reconstituted in sterile 10 mM L-ascorbic acid solution or nutrient broth as necessary.

**1.6 Bacterial Growth/Viability Assessment.** Growth assays were performed in sterile 96-well plates, and  $\text{OD}_{600}$  was monitored by plate reader. Bacterial viability was determined by live/dead bacterial viability assay. Images were captured using fluorescence microscope for live (green fluorescence:  $\lambda_{\text{ex}}$ = 470/40 nm;  $\lambda_{\text{em}}$ = 525/50 nm) and dead cells (red fluorescence:  $\lambda_{\text{ex}}$ =560/40 nm,  $\lambda_{\text{em}}$ = 630/75 nm) with a 60X oil objective. Cell counts to determine the viable cells percentage were quantified by ImageJ from five randomly-chosen fields of view.

## 2. Supplemental Figures:

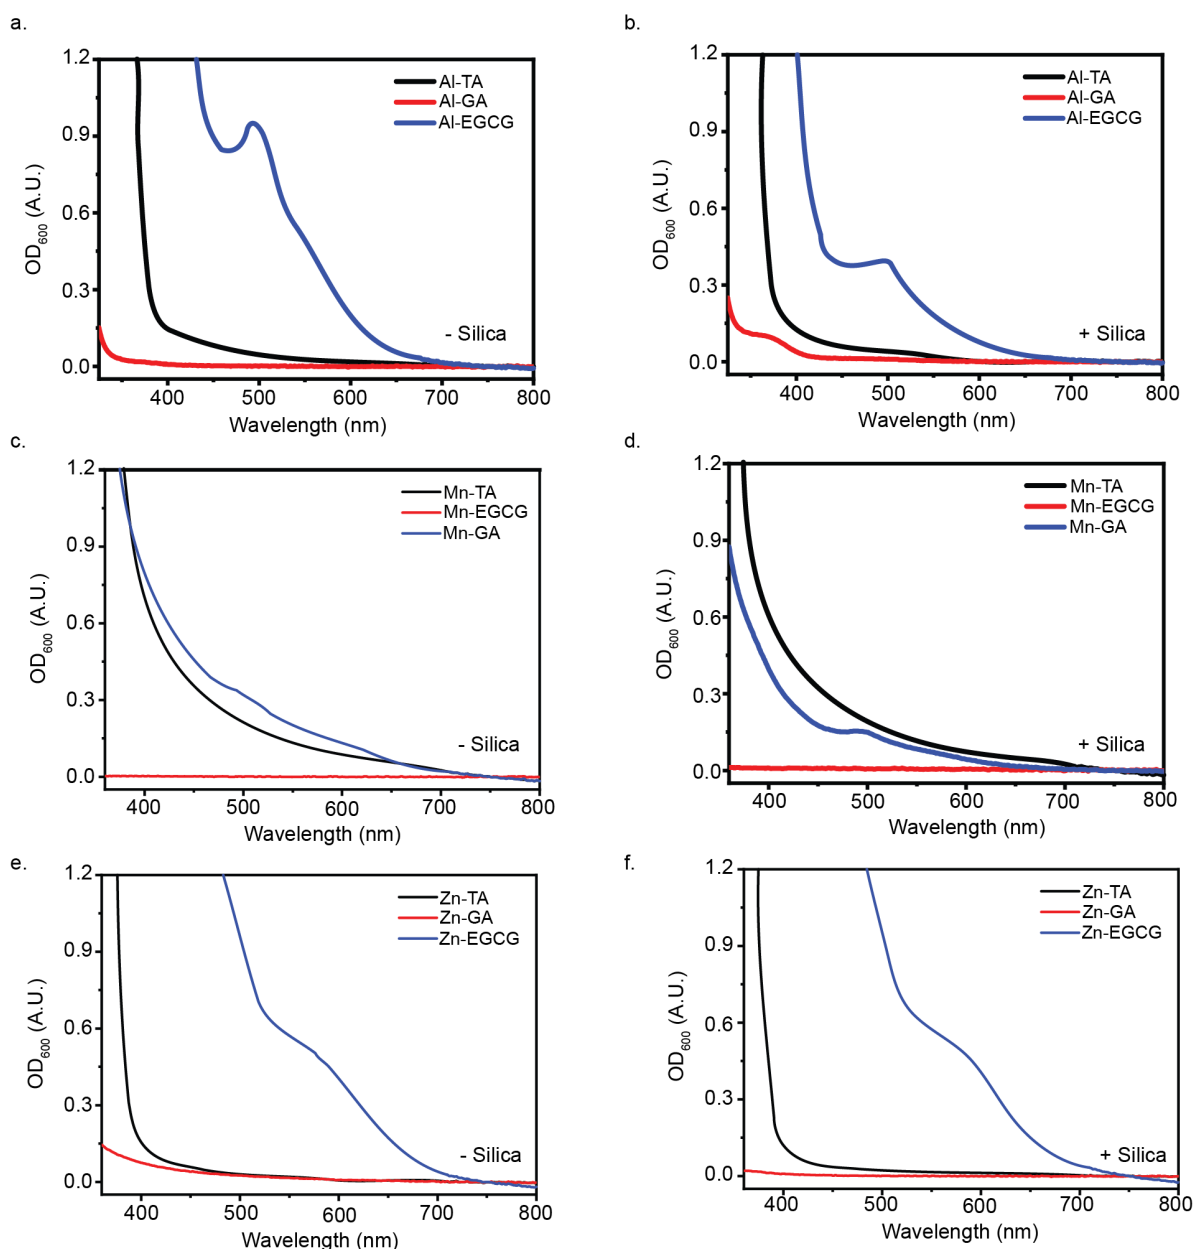

Figure 1. UV-vis spectra of metal-phenolic networks. UV-Vis absorbance of (a) Al<sup>III</sup>-TA, Al<sup>III</sup>-GA, and Al<sup>III</sup>-EGCG complexes in MOPS buffer (10 mM, pH 7.5), (b) Al<sup>III</sup>-TA, Al<sup>III</sup>-GA, and Al<sup>III</sup>-EGCG complexes after addition of silica particles (1 mg/mL); (c) Mn<sup>II</sup>-TA, Mn<sup>II</sup>-GA, and Mn<sup>II</sup>-EGCG complexes in MOPS buffer (10 mM, pH 7.5), (d) Mn<sup>II</sup>-TA, Mn<sup>II</sup>-GA, and Mn<sup>II</sup>-EGCG complexes after addition of silica particles (1 mg/mL); (e) Zn<sup>II</sup>-TA, Zn<sup>II</sup>-GA, and Zn<sup>II</sup>-EGCG complexes in MOPS buffer (10 mM, pH 7.5), (f) Zn<sup>II</sup>-TA, Zn<sup>II</sup>-GA, and Zn<sup>II</sup>-EGCG complexes after addition of silica particles (1 mg/mL).

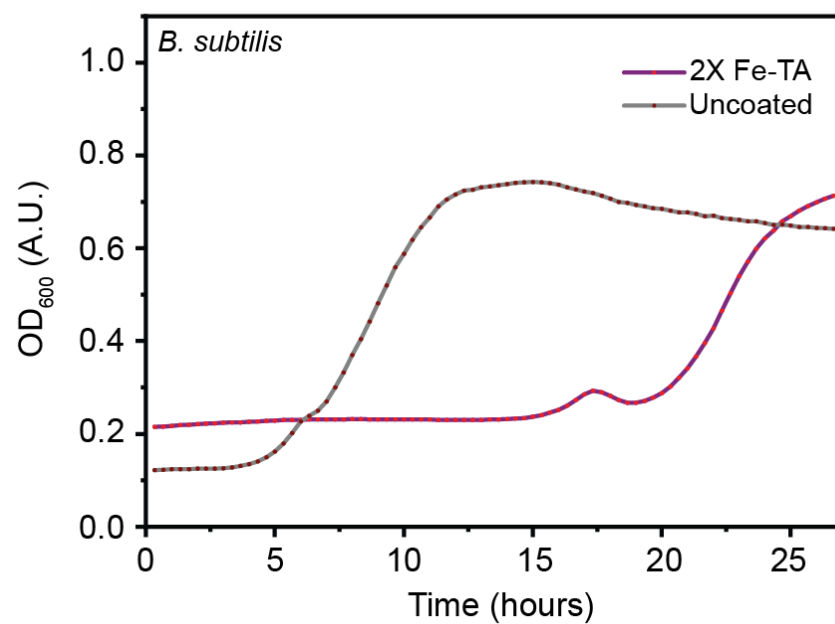

Figure 2. Growth curves monitored at OD<sub>600</sub> of *B. subtilis* alone and MPN-coated *B. subtilis* ("2X" means coating is repeated twice).

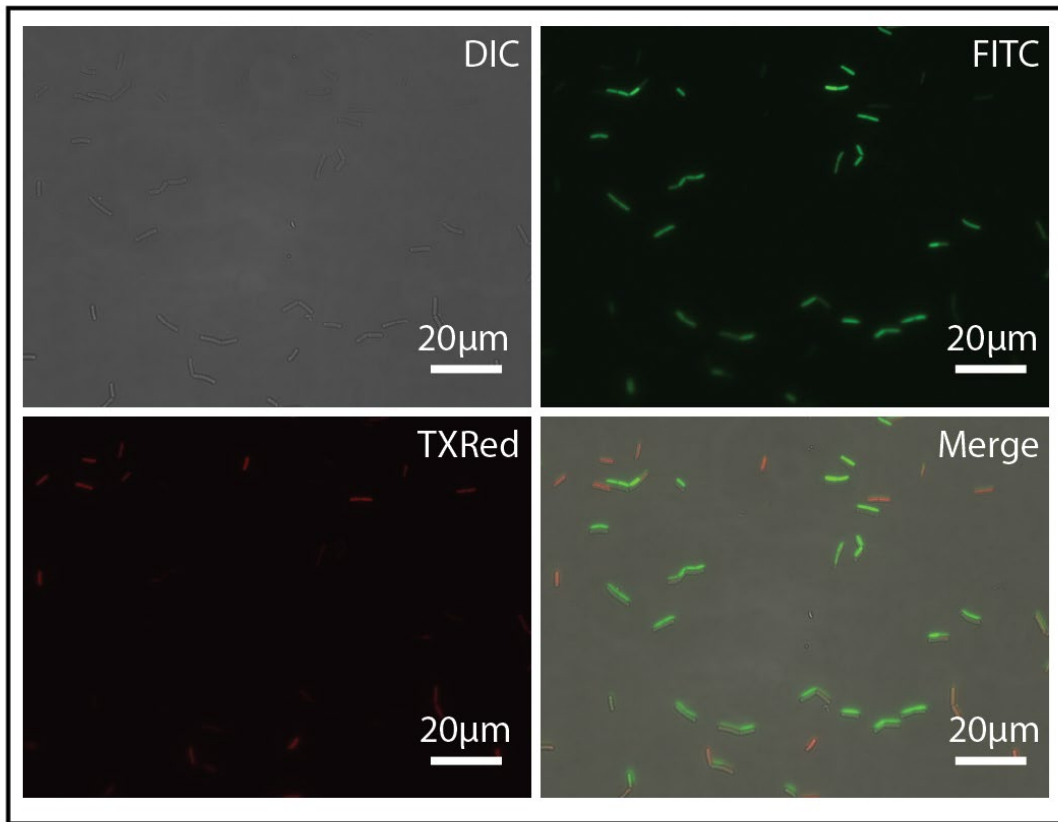

Figure 3. Bacterial viability assessment shows live/dead *B. subtilis* after Fe<sup>III</sup>-TA encapsulation without addition of MOPS buffer (Viability: 54%). Representative composite images of DIC, green (live) and red (dead) fluorescence channels for *B. subtilis*.

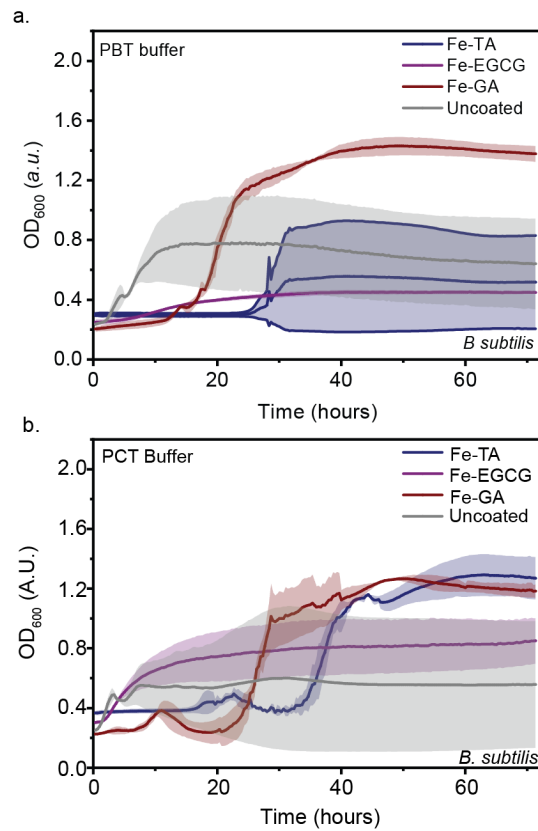

Figure 4. Growth curves monitored at OD<sub>600</sub> of Fe<sup>III</sup>-polyphenol-coated and uncoated *B. subtilis* following lyophilization with cryoprotectants (PB: phosphate-buffered saline; PC: phosphate-citrate buffer; cryoprotectant: 0.1 M trehalose). (Shaded region represents error bars represent SD for n=3 replicates)

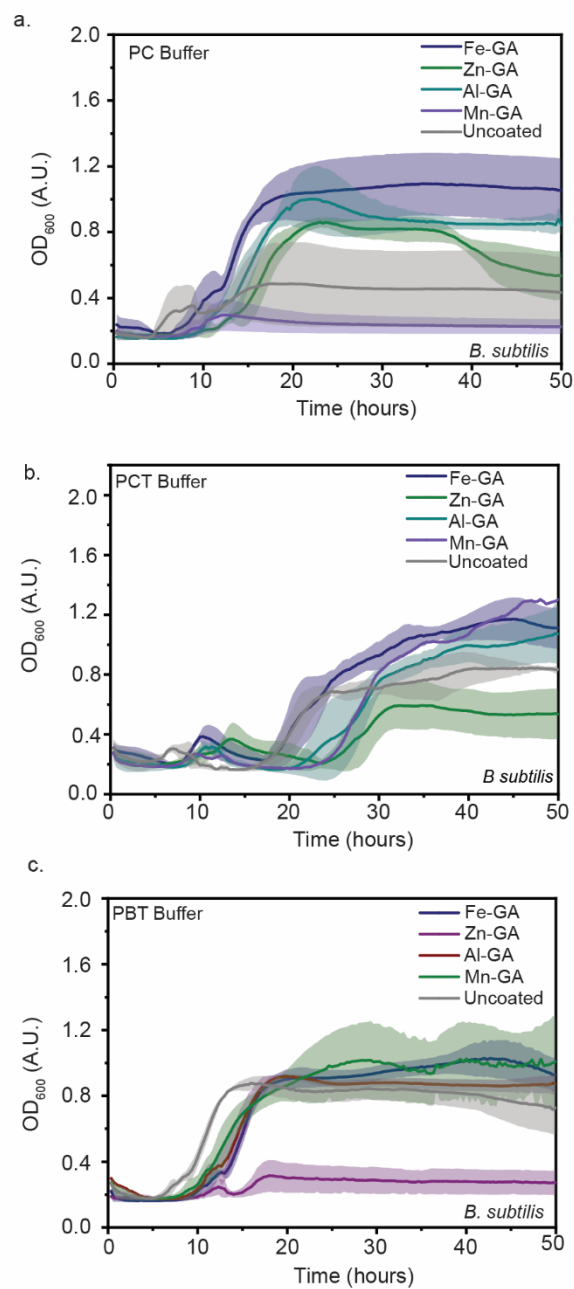

Figure 5. Growth curves monitored at OD<sub>600</sub> of metal-GA-coated and uncoated *B. subtilis* following lyophilization with or without cryoprotectants (PB: phosphate-buffered saline; PC: phosphate-citrate buffer; cryoprotectant: 0.1 M trehalose). (Shaded region represents error bars represent SD for n=3 replicates)

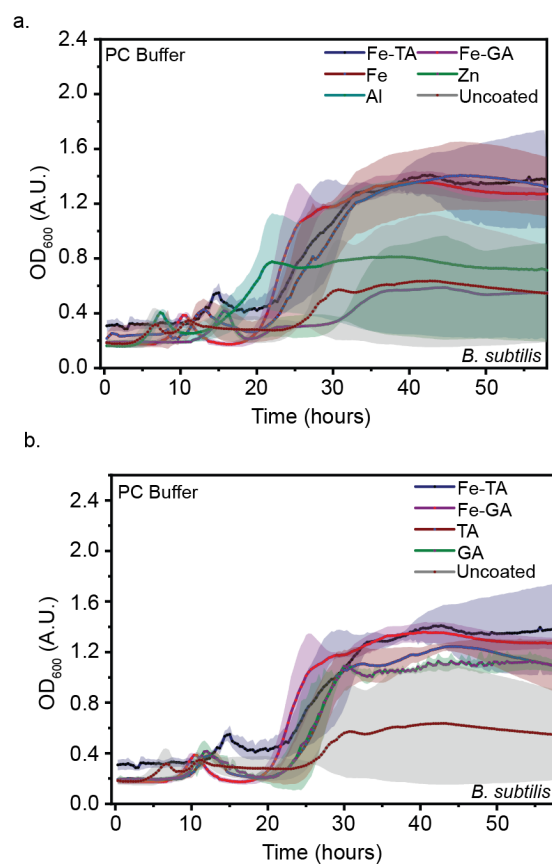

Figure 6. Growth curves monitored at OD<sub>600</sub> of *B. subtilis* alone, with metals (Fe<sup>III</sup>, Zn<sup>II</sup>, and Al<sup>III</sup>) only, with polyphenols (TA, GA) only, and with both (Fe-TA, Fe-GA-MPN-coated) following lyophilization in PC buffer. (Shaded region represents error bars represent SD for n=3 replicates)

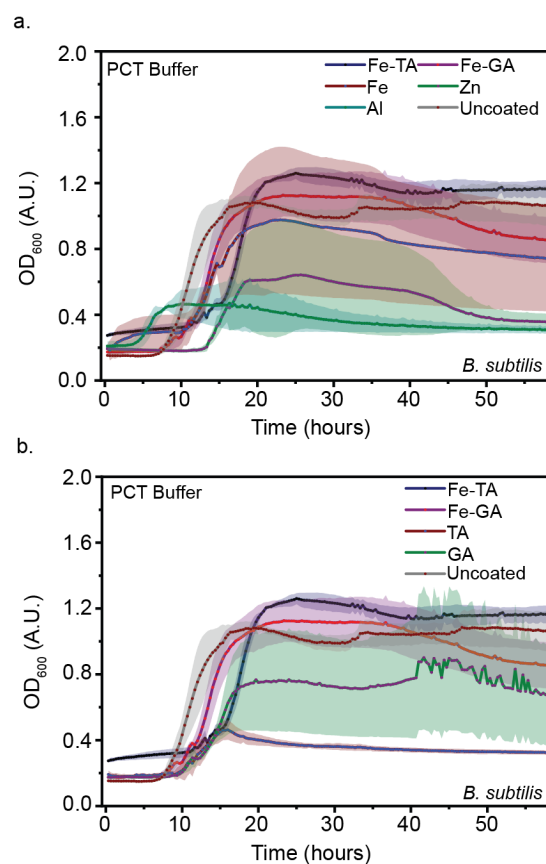

Figure 7. Growth curves monitored at OD<sub>600</sub> of *B. subtilis* alone, with metals (Fe<sup>III</sup>, Zn<sup>II</sup>, and Al<sup>III</sup>) only, with polyphenols (TA, GA) only, and with both (Fe-TA, Fe-GA-MPN-coated) following lyophilization in PC buffer supplement with 0.1 M trehalose. (Shaded region represents error bars represent SD for n=3 replicates)

### 3. References:

- 1 G. Fan, P. Wasuwanich, M. R. Rodriguez-Otero and A. L. Furst, *J. Am. Chem. Soc.*, 2022, **144**, 2438–2443.
